# Supplementary material for: Headaches During Hemodialysis: A Neglected Yet Prevalent Syndrome
Source: Research Square preprint supplement (doi:10.21203/rs.3.rs-7454831/v1), 2025-09-29
Supplement: Supplementary file 1 [file e1665850e20809553ff329c5.xlsx]

## Sheet: Form responses 1
Name	Sex	Age	Hypertension	Diabetes	Other co-morbidities	Pre HD SBP	Pre HD DBP	Post HD SBP	Post HD DBP	Serum creatinine	Serum potasium	Blood urea	Serum sodium	Serum calcium	Serum phosphate	Serum Albumin	Hemoglobin	DIALYSIS CHARECTERISTICS Frequency of HD	Duration of dialysis	Dialyzer reuse	Presence of headache before starting dialysis	Headache associated with first dialysis session	Site of headache	Time between start of HD and onset of headache	SBP during Headache	DBP during headache	Severity of headache: scale of 1 to 10	Treatment of current headache	Past history of headache	Past headache characteristic
K.Venkata krishnaiah	Male	80	Yes	Yes	None	130	70	160	80	5.16	5.16	148	137	8.6	4	4	8.2	Twice a week	4 hours	Re use	No	No	Frontal	Last 1 hour	130	70	4	Paracetamol	No	Not applicable
B Sathish	Male	38 years	Yes	No	None	120	70	110	70	7.49	4.82	143	136	9.2	4	3.8	7.3	thrice a week	4 hours	Re use	No	No	Temporal	Last 1 hour	160	70	4	Paracetamol	No	Not applicable
Ch Manaiah	Male	50 years	Yes	No	None	140	70	130	70	6.39	4.7	126	142	8	3.7	3.6	8.9	Twice a week	4 hours	Re use	Yes	No	Frontotemporal	Last 30 min	170	80	5	Paracetamol	Yes	Tension headache
K Bhavanaiah	Male	42 years	Yes	Yes	None	130	70	110	70	4.47	4.5	80	141	8.7	3	4.3	9.9	Twice a week	4 hours	Re use	No	No	Fronto-parietal	Last 1 hour	140	90	6	Paracetamol	No	Not applicable
Pavani	Female	20 years	Yes	No	None	140	70	160	80	7.36	4.52	132	136	8.9	4.3	3.7	8.6	Twice a week	4 hours	Re use	Yes	No	Temporal	Last 1 hour 30 min	180	100	7	Paracetamol	No	Not applicable
Sk Khadarmasthan	Male	59 years	Yes	Yes	None	140	70	130	70	7.7	3.9	129	140	9.5	3.1	3.8	7.7	thrice a week	4 hours	Re use	No	No	Temporal	First 30 min	150	80	5	Paracetamol	No	Not applicable
Koteshwaramma	Female	55 years	Yes	Yes	None	130	70	110	70	5.19	4.99	114	145	8.7	5.3	4.1	8.5	thrice a week	4 hours	Re use	No	No	Temporal	Last 1 hour	160	70	6	Paracetamol	No	Not applicable
Sd Jahara begam	Female	47 years	Yes	Yes	Hypothyroidism	150	80	110	70	5.6	4.7	97	138	8.6	5.3	4	8.1	thrice a week	4 hours	Re use	No	No	Temporal	Last 1 hour	170	70	8	Paracetamol	No	Not applicable
K Penchalaiah	Male	70 years	Yes	No	None	150	80	130	70	7.04	4.96	138	137	7.7	2.5	2.6	8.2	Twice a week	4 hours	Re use	No	No	Frontotemporal	First 30min	170	80	5	Paracetamol	No	Not applicable
G Bhavani	Female	25 years	Yes	No	Hypothyroidism	120	80	110	70	5.78	4.72	92	138	8.9	4.5	3.6	9.2	thrice a week	4 hours	Re use	Yes	No	Frontal	Last 1 hour	160	90	5	Paracetamol	No	Not applicable
Adisesha reddy	Male	67 years	Yes	Yes	Hypothyroidism	120	70	130	80	4.92	4.69	85	139	9.1	2.9	3.8	8	thrice a week	4 hours	Re use	No	No	Frontal	Last 1 hour	130	100	3	Paracetamol	No	Not applicable
M Suman	Male	33 years	Yes	No	None	140	70	130	80	8.52	5.23	140	142	8.4	8.6	4.2	7.1	thrice a week	4 hours	Re use	No	No	Fronto-parietal	Last 1 hour	122	80	4	Paracetamol	Yes	Tension headache
N Ramesh	Male	39 years	Yes	No	None	180	90	130	70	10.94	5.66	153	139	8.6	4.1	3.7	8.3	Twice a week	4 hours	Re use	Yes	No	Temporal	First 1 hour	190	70	5	Paracetamol	No	Not applicable
Sk khadar hussain	Male	55 years	Yes	Yes	Coronary artery disease	150	80	120	70	2.81	4.61	55	144	9.2	3.8	3.2	9.8	thrice a week	4 hours	Re use	No	No	Frontotemporal	First 1 hour	150	70	4	Paracetamol	Yes	Migraine
Venkata seshaiah	Male	60 years	Yes	No	Coronary artery disease	120	70	130	70	6.13	4.44	120	141	8	6.1	3.5	8.7	thrice a week	4 hours	Re use	No	No	Frontal	Last 1 hour	110	80	3	Paracetamol	No	Not applicable
T Santhakumari	Female	61 years	Yes	No	None	160	80	140	80	6.45	4.23	124	139	8.7	5.4	2.9	8.5	Twice a week	4 hours	Re use	No	No	Fronto-parietal	Last 1 hour	100	90	2	Paracetamol	No	Not applicable
Sd parveen	Female	42 years	Yes	No	None	130	80	150	80	7.31	4.76	128	140	8.9	6.1	3.8	7.9	thrice a week	4 hours	Re use	No	No	Temporal	Last 1 hour	190	100	5	Paracetamol	No	Not applicable
Ramanaiah	Male	66 years	Yes	No	None	150	80	160	80	8.3	5.1	136	140	9.5	5.4	3.6	9	thrice a week	4 hours	Re use	No	No	Frontal	Last 1 hour	180	80	4	Paracetamol	No	Not applicable
Y Subbaiah	Male	50 years	Yes	No	None	190	100	160	80	8.32	4.92	130	142	8.7	5.4	3.6	8	thrice a week	4 hours	Re use	No	No	Frontotemporal	First 1 hour	190	70	6	Paracetamol	No	Not applicable
Sk Asif	Male	49 years	Yes	Yes	None	140	80	120	70	7.36	4.92	136	137	8.6	4	3.9	10.6	Twice a week	4 hours	Re use	No	No	Fronto-parietal	Last 1 hour	144	70	5	Paracetamol	No	Not applicable
Masthanaiah	Male	38 years	Yes	No	None	170	80	180	90	7.86	4.82	146	137	7.7	4.6	3.8	8.9	thrice a week	4 hours	Re use	Yes	Yes	Frontal	Last 1 hour	190	80	6	Paracetamol	No	Not applicable
P Madhavi	Female	46 years	Yes	Yes	Hypothyroidism	130	70	150	80	7.32	4.78	129	144	8.9	2.9	4	7	Twice a week	4 hours	Re use	No	No	Frontal	Last 1 hour	160	90	4	Paracetamol	Yes	Tension headache
B Suresh	Male	32 years	Yes	No	Hypothyroidism	140	80	150	90	12.33	5.58	164	139	9.1	8.6	3.4	7.3	thrice a week	4 hours	Re use	No	No	Frontal	Last 1 hour	170	100	5	Paracetamol	No	Not applicable
Sk Babu	Male	38 years	Yes	No	None	150	80	190	100	4.85	4.42	81	140	8.4	4.1	3.6	9.8	thrice a week	4 hours	Re use	No	Yes	Temporal	Last 1 hour	192	80	6	Paracetamol	No	Not applicable
Arunamma	Female	41 years	Yes	Yes	None	180	90	150	80	10.14	5.26	129	139	8.6	3.8	3.9	9.4	thrice a week	4 hours	First use	No	No	Temporal	Last 1 hour	170	84	4	Paracetamol	No	Not applicable
V Suresh	Male	33 years	Yes	No	None	140	80	130	80	12.1	5	117	140	9.2	6.1	3.4	9.9	thrice a week	4 hours	First use	No	Yes	Temporal	First 1 hour	140	90	4	Paracetamol	No	Not applicable
Niranjan	Male	32 years	Yes	No	None	180	90	170	90	10.93	5.1	179	136	8	5.4	2.7	8.9	thrice a week	4 hours	Re use	No	No	Frontal	First 1 hour	180	100	5	Paracetamol	No	Not applicable
G Muniraja	Male	45 years	Yes	No	None	160	80	170	90	6.88	4.68	113	137	8.7	6.1	4.1	9.4	thrice a week	4 hours	Re use	No	No	Frontal	Last 1 hour	170	114	5	Paracetamol	No	Not applicable
M Madhava rao	Male	39 years	Yes	No	None	150	80	130	70	9.38	5.01	141	138	8.9	5.4	4.1	8	Twice a week	4 hours	Re use	No	No	Frontal	Last 1 hour	180	80	7	Paracetamol	No	Not applicable
C Raja	Male	52 years	Yes	Yes	None	140	70	170	90	6.5	4.7	112	136	9.5	3	3.9	7.9	thrice a week	4 hours	Re use	No	No	Frontal	Last 1 hour	144	90	6	Paracetamol	No	Not applicable
Gangadhar	Male	36 years	Yes	No	None	150	70	180	90	3.79	4.19	56	137	8.7	4.1	3.8	9.8	thrice a week	4 hours	Re use	No	No	Temporal	Last 1 hour	138	100	5	Paracetamol	No	Not applicable
E Kanthamma	Female	60 years	Yes	No	None	140	70	130	70	6.9	4.2	78	137	8.6	4.7	4.1	9.5	Twice a week	4 hours	Re use	No	Yes	Frontotemporal	First 30 min	154	80	5	Paracetamol	No	Not applicable
P Sampoornamma	Female	57 years	Yes	Yes	None	130	80	110	70	2.4	4.81	58	144	7.7	6.8	3.8	7	thrice a week	4 hours	Re use	No	No	Frontotemporal	Post dialysis	138	84	5	Paracetamol	No	Not applicable
JANARDHAN	Male	58 years	Yes	Yes	None	180	100	180	80	8.2	5.3	130	144	8.9	6.5	3.7	10	Twice a week	4 hours	First use	No	No	Frontal	Last 1 hour	156	90	5	Paracetamol	No	Not applicable
Hariram reddy	Male	45 years	Yes	Yes	None	150	80	160	90	8	4.6	77	133	9.1	3	4.4	7.8	thrice a week	4 hours	First use	Yes	Yes	Frontal	First 30 min	190	100	9	Tramadol	No	Tension headache
Radhaiah	Male	73 years	Yes	Yes	Coronary artery disease	180	80	140	50	4.7	4.4	86	133	8.4	4.1	4.1	10.9	thrice a week	4 hours	Re use	No	No	Frontal	Last 1 hour	156	114	6	Paracetamol	No	Not applicable
Seshu reddy	Male	57 years	Yes	Yes	None	150	70	140	70	9.2	6	169	139	8.7	4.7	3.4	10.4	thrice a week	4 hours	First use	Yes	Yes	Temporal	Post dialysis	164	90	5	Paracetamol	Yes	Tension headache
Subbarami reddy	Male	85 years	Yes	No	None	160	90	140	70	6.57	6.9	136	136	8.9	6.8	3.8	10.5	thrice a week	4 hours	First use	No	No	Frontal	First 30 min	174	84	8	Paracetamol	No	Not applicable
G.Srinivasulu	Male	58 years	Yes	Yes	None	170	90	140	90	6.7	4.2	115	130	9.5	6.5	3.4	7.6	thrice a week	4 hours	First use	No	No	Fronto-parietal	First 30 min	180	90	9	Paracetamol	No	Not applicable
Seetha rajyalakshmi	Female	66 years	Yes	Yes	None	190	100	150	80	5.6	5	91	133	8.7	4.4	4.1	10.7	Twice a week	4 hours	First use	No	No	Frontotemporal	First 30 min	122	76	4	Paracetamol	No	Not applicable
Gouse basha	Male	52 years	Yes	Yes	None	170	90	140	70	10.6	4.3	105	139	8.6	3.1	4	10.7	thrice a week	4 hours	First use	No	No	Temporal	First 30 min	134	82	5	Paracetamol	No	Not applicable
Kalyani	Female	39 years	Yes	No	Hypothyroidism	170	100	150	70	9.4	5.5	67	138	7.7	6.2	2.6	9.9	Twice a week	4 hours	First use	Yes	Yes	Occipital	Last 1 hour	146	68	9	Tramadol	No	Tension headache
Sylendra reddy	Male	57 years	No	Yes	None	180	100	140	60	10.9	4.8	117	138	8.9	6	3.6	12.1	thrice a week	4 hours	First use	No	No	Temporal	Last 1 hour	148	74	6	Paracetamol	No	Not applicable
Syamalamma	Female	70 years	Yes	No	None	140	80	130	70	4.17	4.2	97	137	9.1	4	3.8	11.1	thrice a week	4 hours	First use	No	Yes	Temporal	Last 1 hour	150	100	5	Paracetamol	No	Not applicable
V Penchalaiah	Male	47 years	Yes	Yes	None	160	90	140	70	8.2	4.8	89	132	8.4	3.2	4.2	13.1	thrice a week	4 hours	First use	No	No	Occipital	Last 1 hour	210	106	8	Paracetamol	No	Not applicable
M Prathap reddy	Male	63 years	Yes	Yes	None	180	90	130	70	5.23	4.7	94	135	8.8	3.7	3.7	10.3	thrice a week	4 hours	First use	Yes	No	Frontotemporal	Last 1 hour	132	78	9	Paracetamol	Yes	Tension headache
N Parvathi	Female	53 years	Yes	No	None	170	80	130	70	4.7	5.1	69	134	8.2	3.4	3.2	9.6	thrice a week	4 hours	First use	No	Yes	Temporal	Last 1 hour	174	84	4	Tramadol	Yes	Tension headache
Sunandana	Female	44 years	Yes	No	None	180	90	150	70	7.1	6	68	134	8	5.4	3.5	9.4	thrice a week	4 hours	First use	No	Yes	Temporal	First 30 min	168	84	5	Tramadol	No	Not applicable
Jamal basha	Male	54 years	Yes	Yes	Coronary artery disease	160	70	130	60	4.2	4.3	71	134	8.3	5.9	2.9	9.7	thrice a week	4 hours	First use	No	No	Frontal	Last 1 hour	178	90	9	Paracetamol	No	Not applicable
Chandrasenamma	Female	62 years	Yes	Yes	None	170	80	150	70	5.7	4.6	91	133	8.7	2.7	3.8	11.5	thrice a week	4 hours	First use	Yes	No	Frontotemporal	First 30 min	200	100	6	Paracetamol	Yes	Tension headache
Amaranath	Male	70 years	Yes	Yes	Coronary artery disease	130	60	140	70	6.82	5.8	135	134	9.2	6.1	3.6	12.4	thrice a week		First use	No	Yes	Frontal	Last 1 hour	138	114	5	Paracetamol	No	Not applicable
Sangeetha	Female	53 years	Yes	No	None	140	60	100	50	7.2	3.4	132	137	8.1	5.9	3.6	13.9	Twice a week	4 hours	First use	No	Yes	Temporal	First 30 min	140	90	8	Paracetamol	No	Not applicable
Ramachandraiah	Male	62 years	Yes	No	None	140	70	130	60	7.5	5.2	49	137	8.1	2.9	3.9	11.2	thrice a week	4 hours	First use	No	No	Fronto-parietal	Last 1 hour	180	84	9	Paracetamol	No	Not applicable
Uma devi	Female	48 years	Yes	Yes	Coronary artery disease	160	100	140	80	3.4	3.9	144		9.4	4.5	3.8	11.2	thrice a week	4 hours	First use	Yes	Yes	Temporal	First 30 min	190	90	4	Paracetamol	Yes	Tension headache
Krishna madhuri	Female	37 years	Yes	No	None	140	70	110	70	5.6	5.7	80	140	9.4	2	4	11.1	thrice a week	4 hours	First use	No	Yes	Temporal	End of hd	200	76	5	Paracetamol	No	Not applicable
Subramanya reddy	Male	72 years	Yes	No	None	120	80	110	70	7.84	3.7	86	131	8.3	7.8	3.4	9.4	Weekly once	4 hours	First use	No	No	Frontotemporal	Last 1 hour	164	82	6	Paracetamol	No	Not applicable
Kalpana	Female	39	Yes	No	None	120	70	130	70	7.3	5.5	176	135	7.8	3.4	3.6	7.6	thrice a week	4 hours	First use	No	No	Frontal	Last 1 hour	156	68	8	Paracetamol	No	Not applicable
Ramanamma	Female	68 years	Yes	No	None	190	70	180	100	10.7	5.9	151	132	8.2	7.5	3.9	10.9	Twice a week	4 hours	First use	Yes	No	Occipital	First 30 min	156	74	8	Paracetamol	Yes	Tension headache
Jayaramaiah	Male	69 years	Yes	Yes	None	140	70	150	70	5.6	4.6	78	136	8	1.6	3.4	11.2	thrice a week	4 hours	First use	No	No	Temporal	Last 1 hour	160	100	7	Paracetamol	No	Not applicable
Pavani	Female	19 years	Yes	No	None	130	80	140	80	3.1	3.1	44	137	7.7	4	2.7	8.3	Twice a week	4 hours	First use	No	Yes	Temporal	First 30 min	170	106	8	Paracetamol	Yes	Tension headache
Rajasekhar reddy	Male	60 years	Yes	Yes	Coronary artery disease	170	80	150	90	4.9	4.4	50	133	9.2	4	4.1	10.3	thrice a week	4 hours	First use	No	No	Occipital	Last 1 hour	154	78	6	Paracetamol	No	Not applicable
Pooja Devendrakumar	Female	55	Yes	Yes	None	200	100	130	70	5	4.8	61	136	8.8	3.7	4.1	11	thrice a week	4 hours	First use	No	Yes	Temporal	Last 1 hour	142	84	4	Paracetamol	No	Not applicable
P Gopal reddy	Male	70 years	Yes	Yes	None	190	70	140	60	4.35	4.3	81	140	8.6	3	3.9	7.9	Twice a week	4 hours	First use	No	Yes	Temporal	First 30 min	124	80	4	Paracetamol	No	Tension headache
S pullaiah	Male	67 years	Yes	Yes	None	140	60	140	80	7.9	4.9	133	138	7.4	4.3	3.8	10.1	Twice a week	4 hours	First use	No	No	Frontal	Last 1 hour	136	70	7	Paracetamol	No	Not applicable
Mohan ramaiah	Male	76 years	Yes	Yes	None	130	60	150	60	5.8	5.6	91	141	9.9	3.1	4.1	11	Twice a week	4 hours	First use	No	No	Frontotemporal	Last 1 hour	180	70	8	Paracetamol	No	Not applicable
Dora raju	Male	61	Yes	Yes	None	160	80	130	70	8.3	5.7	125	139	8.9	5.3	3.8	13	thrice a week	4 hours	First use	Yes	No	Frontal	First 30 min	190	80	6	Paracetamol	Yes	Tension headache
Chiranjeevulu	Male	60 years	Yes	Yes	None	160	90	140	70	8.82	5.5	113	132	8.9	5.3	3.7	7.9	Twice a week	4 hours	First use	No	No	Frontotemporal	Last 1 hour	200	90	4	Paracetamol	No	Not applicable
Vincent Paul	Male	33 years	Yes	No	None	130	80	110	60	5	3.8	36	143	8.3	2.5	4.4	8.2	thrice a week	4 hours	First use	No	No	Frontotemporal	Last 1 hour	198	100	4	Paracetamol	No	Not applicable
Mangilal	Male	57 years	Yes	Yes	None	150	90	130	70	8	3	147	139	8.8	4.5	4.1	11.2	thrice a week	4 hours	First use	No	No	Fronto-parietal	First 30 min	144	80	6	Paracetamol	No	Not applicable
Hemanath reddy	Male	65 years	Yes	Yes	None	160	60	150	60	5.3	5.6	140	131	9.2	2.9	3.4	10.2	Twice a week	4 hours	First use	No	No	Fronto-parietal	Last 1 hour	156	70	7	Paracetamol	No	Not applicable
Venkataramaraju	Male	65	Yes	Yes	Hypothyroidism	180	70	140	80	9.68	5.5	172	134	8.6	8.6	3.8	10.3	Twice a week	4 hours	First use	No	No	Frontotemporal	Last 1 hour	160	70	8	Paracetamol	No	Not applicable
Chandrakala	Female	61 years	Yes	Yes	None	150	70	140	70	7.3	5.7	99	136	8.7	4.1	3.4	10.8	Twice a week	4 hours	First use	Yes	Yes	Temporal	Post dialysis	180	80	3	Paracetamol	Yes	Tension headache
Parveen	Female	26 years	Yes	No	None	150	110	120	70	6.8	4.7	89	136	8.1	3.8	4.1	9.8	Twice a week	4 hours	First use	No	Yes	Frontal	First 30 min	200	90	5	Paracetamol	No	Not applicable
Manjula Rani	Female	52 years	Yes	No	None	150	70	140	70	7.4	5.6	120	138	9.7	6.1	4.1	10.1	Twice a week	4 hours	First use	No	Yes	Frontotemporal	Last 1 hour	180	90	6	Paracetamol	Yes	Tension headache
Venugopal reddy	Male	62	Yes	Yes	Hypothyroidism	190	100	170	80	9.02	5.4	90	143	8.8	5.4	4	10.6	thrice a week	4 hours	First use	No	Yes	Occipital	Last 1 hour	190	84	4	Paracetamol	No	Not applicable
Madhusudhan rao	Male	53 years	Yes	No	None	170	90	190	80	7.2	5.5	104	139	8.3	6.1	3.9	8.9	thrice a week	4 hours	First use	No	No	Frontal	Last 1 hour	190	90	8	Tramadol	No	Not applicable
Seenamma	Female	56 years	Yes	Yes	None	150	80	130	60	4.4	4.6	39	136	9.3	5.4	4.1	12.4	thrice a week	4 hours	First use	No	No	Fronto-parietal	Last 1 hour	168	76	9	Tramadol	No	Not applicable
Manjula	Female	50 years	Yes	Yes	Hypothyroidism	180	80	130	70	6.7	5.2	121	135	8.6	5.4	3.7	11.9	Twice a week	4 hours	First use	Yes	Yes	Parietal	First 30 min	180	82	6	Tramadol	Yes	Tension headache
Venkatakrishna reddy	Male	69	Yes	No	None	160	90	160	80	7.48	5.2	100	125	8.6	4	5	12.6	thrice a week	4 hours	First use	Yes	No	Temporal	Last 1 hour	148	68	4	Paracetamol	Yes	Tension headache
Guravaiah	Male	73 years	Yes	No	None	160	90	150	80	6.57	4.6	82	126	8.9	4.6	3.9	11.8	thrice a week	4 hours	First use	No	No	Fronto-parietal	Last 1 hour	136	74	6	Paracetamol	No	Not applicable
Chamundeshwari	Female	33 years	Yes	No	None	130	70	160	80	9.8	5.4	63	132	9.3	6	3.6	12.2	Twice a week	4 hours	First use	Yes	Maybe	Temporal	First 30 min	170	100	3	Paracetamol	Yes	Tension headache
Sarojini	Female	58 years	Yes	Yes	None	140	90	120	60	4.2	4	60	134	8	3.6	3.6	8.7	thrice a week	4 hours	First use	No	Maybe	Temporal	First 30 min	150	106	3	Paracetamol	Yes	Tension headache
K Parvathi	Female	66 years	Yes	No	Hypothyroidism	160	80	140	70	5.3	3.8	63	132	8.1	2	3.5	9.3	thrice a week	4 hours	First use	No	No	Parietal	Last 1 hour	180	90	4	Paracetamol	No	Not applicable
Nagamani	Female	75	Yes	Yes	None	160	80	150	80	1.95	3	3.7	142	9.6	3	3.4	11	Once every 5 days	4 hours	First use	Yes	No	Fronto-parietal	Last 1 hour	156	78	8	Paracetamol	Yes	Cluster headache
Subhasini	Female	57 years	Yes	Yes	None	150	60	130	60	5.1	5.5	40	141	7	6.1	3.2	11.6	Twice a week	4 hours	First use	Yes	Maybe	Frontotemporal	First 30 min	180	100	9	Paracetamol	Yes	Migraine
Ramadevi	Female	56 years	Yes	No	None	160	80	140	90	7.2	5.5	102	140	8.8	4.5	4.2	11.8	Twice a week	4 hours	First use	No	Yes	Parietal	Last 1 hour	180	94	8	Tramadol	No	Not applicable
Pandari bai	Female	50	Yes	Yes	Coronary artery disease	170	90	160	80	7	4.9	99	138	8.7	3.6	4	9.4	thrice a week	4 hours	First use	No	Yes	Frontal	Last 1 hour	168	86	9	Paracetamol	No	Not applicable
Srilatha	Female	38 years	Yes	No	None	160	90	160	80	6	5.5	67	136	8.8	6.3	3.8	7.4	thrice a week	4 hours	First use	Yes	Maybe	Temporal	First 30 min	190	90	10	Paracetamol	Yes	Migraine
Padmavathi	Female	60 years	Yes	No	Coronary artery disease	150	80	160	90	4.2	5.4	87	135	9.3	3.5	3.8	9.9	thrice a week	4 hours	First use	Yes	Yes	Temporal	First 30 min	170	88	3	Paracetamol	Yes	Tension headache
Ramaniah	Male	58	Yes	Yes	None	160	80	140	70	8.5	4.3	9.5	133	8.3	4.1	4.5	4.3	thrice a week	4 hours	First use	No	Yes	Frontal	First 30 min	200	104	4	Paracetamol	No	Not applicable
Indira	Female	64	Yes	Yes	None	160	90	130	80	9.8	6.2	158	135	9.9	6.2	4.4	11.2	Twice a week	4 hours	First use	No	Yes	Parietal	First 30 min	190	90	5	Paracetamol	Yes	Tension headache
Surya prakash	Male	58	Yes	Yes	Hypothyroidism	140	80	130	60	5	3.5	58	134	7.8	3.1	3	11.5	Twice a week	4 hours	First use	No	No	Frontotemporal	Last 1 hour	158	74	6	Paracetamol	No	Not applicable
M Santhi	Female	47 years	Yes	Yes	None	120	80	140	70	2.3	5	20	137	8.7	3.1	3.7	8	thrice a week	4 hours	First use	No	Yes	Temporal	Post dialysis	138	80	4	Paracetamol	No	Not applicable
Museera	Female	45	Yes	No	None	180	80	140	80	3.9	5.8	121	136	9.6	6.5	3	8.7	thrice a week	4 hours	First use	No	No	Fronto-parietal	Last 1 hour	122	68	6	Paracetamol	No	Not applicable
Mallikarjunaiah	Male	45 years	Yes	Yes	None	160	80	150	70	7.4	4.9	80	138	8	3.9	3.5	7.3	thrice a week	4 hours	First use	No	Yes	Occipital	Post dialysis	128	68	4	Paracetamol	Yes	Tension headache
Thirupal naidu	Male	69 years	Yes	No	None	170	90	160	80	6.32	5.4	90	133	8.2	3.6	4.2	9.6	thrice a week	4 hours	First use	Yes	No	Frontotemporal	First 30 min	166	86	3	Paracetamol	Yes	Tension headache
Ramesh babu	Male	43	Yes	No	None	170	90	160	80	13.5	4.3	104	137	9.5	3.4	3.9	9.5	Twice a week	4 hours	First use	No	No	Frontal	Last 1 hour	176	90	7	Paracetamol	No	Not applicable
Nagaraju	Male	43 years	Yes	No	Coronary artery disease	160	100	150	100	5.8	3.7	72	138	8.5	2.8	3.9	13.6	Twice a week	4 hours	First use	Yes	Maybe	Occipital	Last 1 hour	184	88	4	Paracetamol	Yes	Tension headache
Chennakeshava rao	Male	61	Yes	Yes	None	170	100	150	100	6.2	5.1	94	136	7.7	2	4.2	7.5	Twice a week	4 hours	First use	No	No	Occipital	Last 1 hour	194	104	6	Tramadol	No	Not applicable
Rajabagyalakshmi	Female	64 years	Yes	Yes	None	150	90	130	80	6.6	5.6	97	139	8.6	7.9	3.7	10.1	thrice a week	4 hours	First use	Yes	Maybe	Frontotemporal	First 30 min	190	90	3	Tramadol	Yes	Tension headache
Bakthavatchal reddy	Male	62 years	Yes	Yes	Coronary artery disease	130	70	160	80	5.4	5.5	93	144	8	3.4	3.5	9.4	thrice a week	4 hours	First use	No	Maybe	Temporal	Last 1 hour	140	74	6	Paracetamol	No	Not applicable
Venkateshwarlu.k	Male	46	Yes	Yes	None	170	90	160	80	2.5	3.8	35	138	9.8	2.3	4.3	9.6	thrice a week	4 hours	First use	No	No	Temporal	Last 1 hour	144	80	8	Paracetamol	No	Not applicable
